# Supplementary material
Source: PubMed Central journal article supplement (PMC2672485)
Supplement: 0901846106_0901846106SI.pdf [file 0901846106_0901846106SI.pdf]

# Supporting Information

Smith and Yarnell 10.1073/pnas.0901846106

## SI Text

**Note on New World Domesticates.** Discussions of the independent domestication of plants in different regions of the New World rarely consider the bottle gourd (*Lagenaria siceraria*) because it was a “utilitarian” domesticate rather than a food plant. Highly prized for its strong, lightweight fruits, which made for excellent containers and vessels of various shapes and sizes, the bottle

gourd was carried from Asia to the Americas by either ocean currents or, more likely, Paleoindian colonists (along with another utilitarian domesticate, *Canis familiaris*), reaching the New World by 10,000 B.P. (1). It reached eastern North America by 7300 B.P. (2) and is frequently recovered in association with eastern North American domesticates, particularly before the development of ceramic vessels in the region.

1. Erickson D, Smith BD, Clarke A, Sandweiss D, Tuross N (2005) An Asian origin for a 10,000-year-old domesticated plant in the Americas. *Proc Natl Acad Sci USA* 102:18315–18320.

2. Doran G, Dickel DN, Newsom LA (1990) A 7,290-year old bottle gourd from the Windover site, Florida. *Am Antiq* 55:354–359.



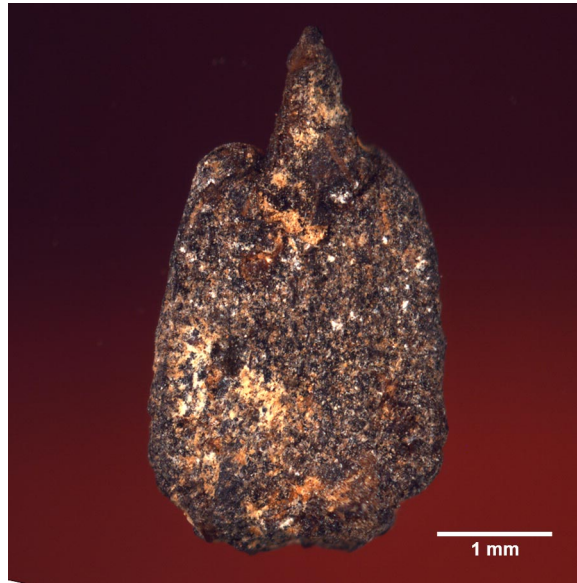

**Fig. S2.** Riverton site marshelder kernel (*Iva annua* var. *macrocarpa*) from Fig. 2, Feature 29, block excavation Unit X. The specimen is identified as domesticated *I. annua* based on its large size, length-to-width ratio, and seed outline in comparison with wild relatives and the seeds of other eastern seed plants. A fragment of pericarp is intact on one “shoulder” showing distinctive “hunched shoulder” morphology.

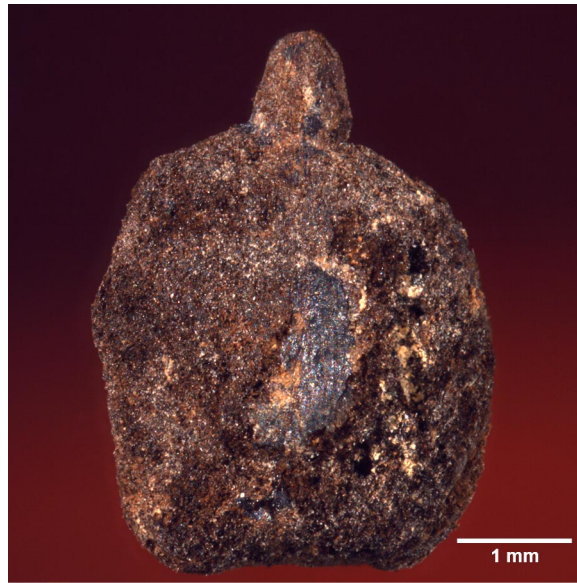

**Fig. S3.** Riverton site marshelder kernel (*I. annua* var. *macrocarpa*) (pericarp absent) from Fig. 2, Feature 29, block excavation Unit X. The specimen is identified as domesticated *I. annua* based on its large size, length-to-width ratio, and seed outline in comparison with wild relatives and the seeds of other eastern seed plants.

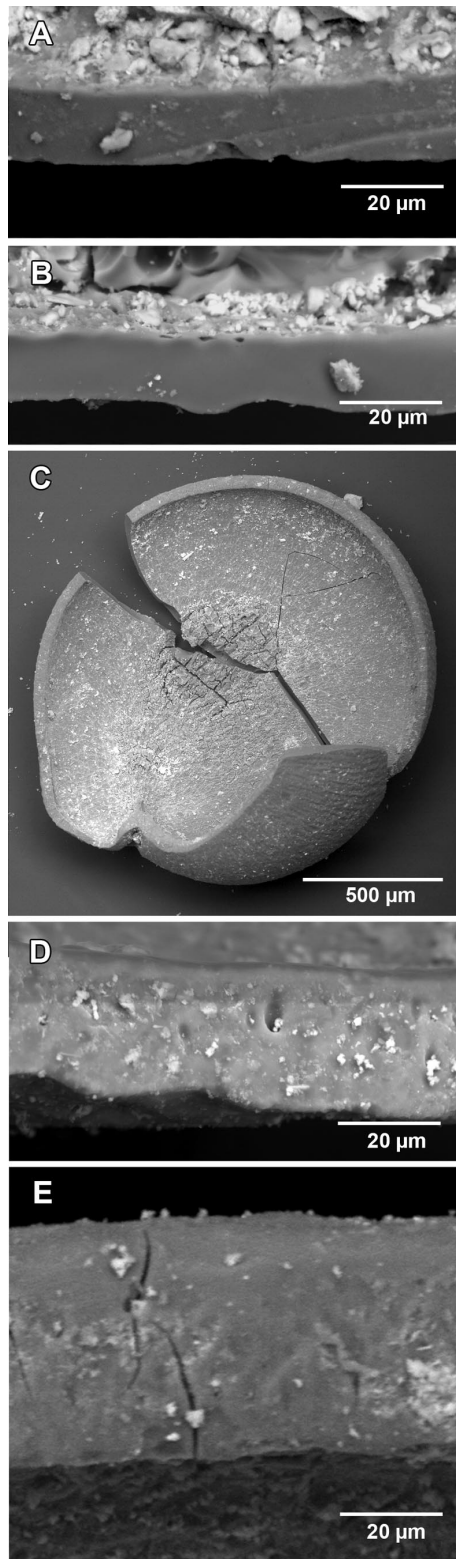

**Fig. S4.** Scanning electron micrographs of thin-testa domesticated chenopodium (*Chenopodium berlandieri* ssp. *jonesianum*) (A and B) and weed morph *C. berlandieri* (C–E) specimens from the Riverton site. (A and B) Testa cross-sections of thin-testa domesticated *C. berlandieri* seeds from Fig. 2, Feature 8A. (C) Interior view of *C. berlandieri* seed from Feature 29 showing rounded margin configuration and less-pronounced beak characteristics of the weed morph. (D) Testa cross-section of weed morph seed from Feature 29. (E) Testa cross-section of weed morph seed shown in C, from Feature 29.

**Table S1. The earliest occurrence of indigenous domesticated seed crops in ENA**

| Domesticated plant species                                | Age, AMS-calibrated<br>calendar years B.P. |                      | Age, radiocarbon<br>years B.P. | Laboratory<br>sample no. | Archaeological site and provenience    |
|-----------------------------------------------------------|--------------------------------------------|----------------------|--------------------------------|--------------------------|----------------------------------------|
|                                                           | Intercept                                  | 1 $\sigma$ age range |                                |                          |                                        |
| <i>Pepo</i> squash ( <i>C. pepo</i> ssp. <i>ovifera</i> ) | 5,025                                      | 5,290–4,870          | 4,440 $\pm$ 75                 | $\beta$ 47293            | Phillips Spring (Unit K <sup>2</sup> ) |
| Sunflower ( <i>H. annuus</i> )                            | 4,840                                      | 4,860–4,830          | 4,265 $\pm$ 60                 | $\beta$ 45050            | Hayes (Level 14)                       |
| Marshelder ( <i>I. annua</i> )                            | 4,400                                      | 4,420–4,290          | 3,920 $\pm$ 40                 | $\beta$ 216463           | Napoleon Hollow (Fig. 2, Feature 20)   |
| Chenopod ( <i>C. berlandieri</i> ) ("naked")              | 3,820                                      | 3,830–3,700          | 3,490 $\pm$ 40                 | $\beta$ 253114           | Riverton (Fig. 2, Feature 1B)          |
| Chenopod ( <i>C. berlandieri</i> ) (thin-testa)           | 3,700                                      | 3,900–3,490          | 3,450 $\pm$ 150                | $\beta$ 11348            | Cloudsplitter (F.S. 1361)              |
| Chenopod ( <i>C. berlandieri</i> ) (thin-testa)           | 3,690                                      | 3,810–3,640          | 3,440 $\pm$ 40                 | $\beta$ 253117           | Riverton (Fig. 2, Feature 8A)          |
| Chenopod ( <i>C. berlandieri</i> ) (thin-testa)           | 3,640                                      | 3,840–3,460          | 3,400 $\pm$ 150                | $\beta$ 11347            | Newt Kash (EI 1114)                    |
